# Supplementary material for: High-speed 4D neutron computed tomography for quantifying water dynamics in polymer electrolyte fuel cells
Source: PubMed Central journal article supplement (PMC8956593; doi:10.1038/s41467-022-29313-5), 2022-03-25
Supplement: 41467_2022_29313_MOESM1_ESM.pdf [file 41467_2022_29313_MOESM1_ESM.pdf]

**Supplementary Information:**

**High-Speed 4D Neutron Computed Tomography for Quantifying Water  
Dynamics in Polymer Electrolyte Fuel Cells**

Ziesche et al.

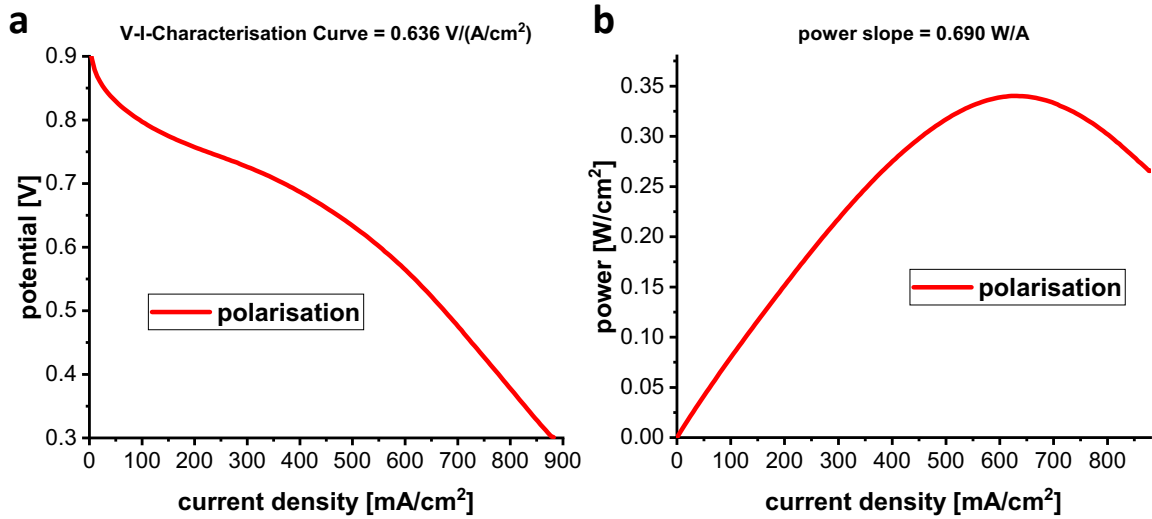

**Supplementary Figure 1: Pre-beamtime laboratory testing; Polarisation and power curves of the single serpentine PEFC: a** V-I characteristic with average V-I slope of 636 Ohm cm<sup>-2</sup> in the working region of the cell. **b** power curve with a maximum of 340 mW cm<sup>-2</sup> at a current density of 627 mA cm<sup>-2</sup> and a potential of 543 mV. In the linear working region the cell exhibits shows a power slope of 690 mW A<sup>-1</sup> or mV.

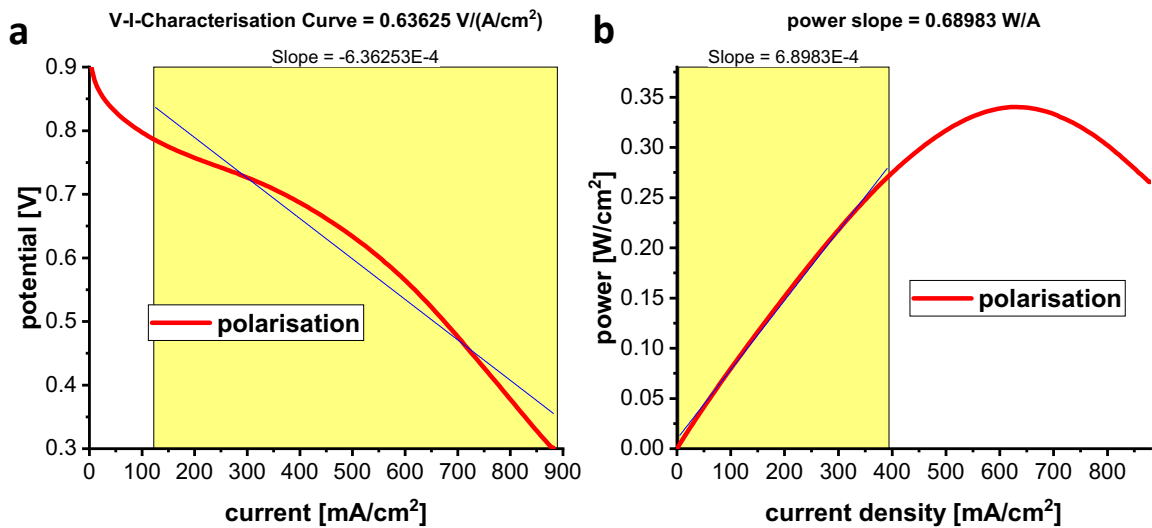

**Supplementary Figure 2: Pre-beamtime laboratory testing; Polarisation and power curves of the single serpentine PEFC with fits of the V-I-characterisation and the power slope: a** shows the V-I characterisation curve of the used fuel cell with a V-I slope of about 636 mV/(A/cm<sup>2</sup>) in the working range. **b** displays the corresponding power curve with a maximum of ca. 340 mW at 543 mA and a power increase of ca. 690 mW/A in the working range.

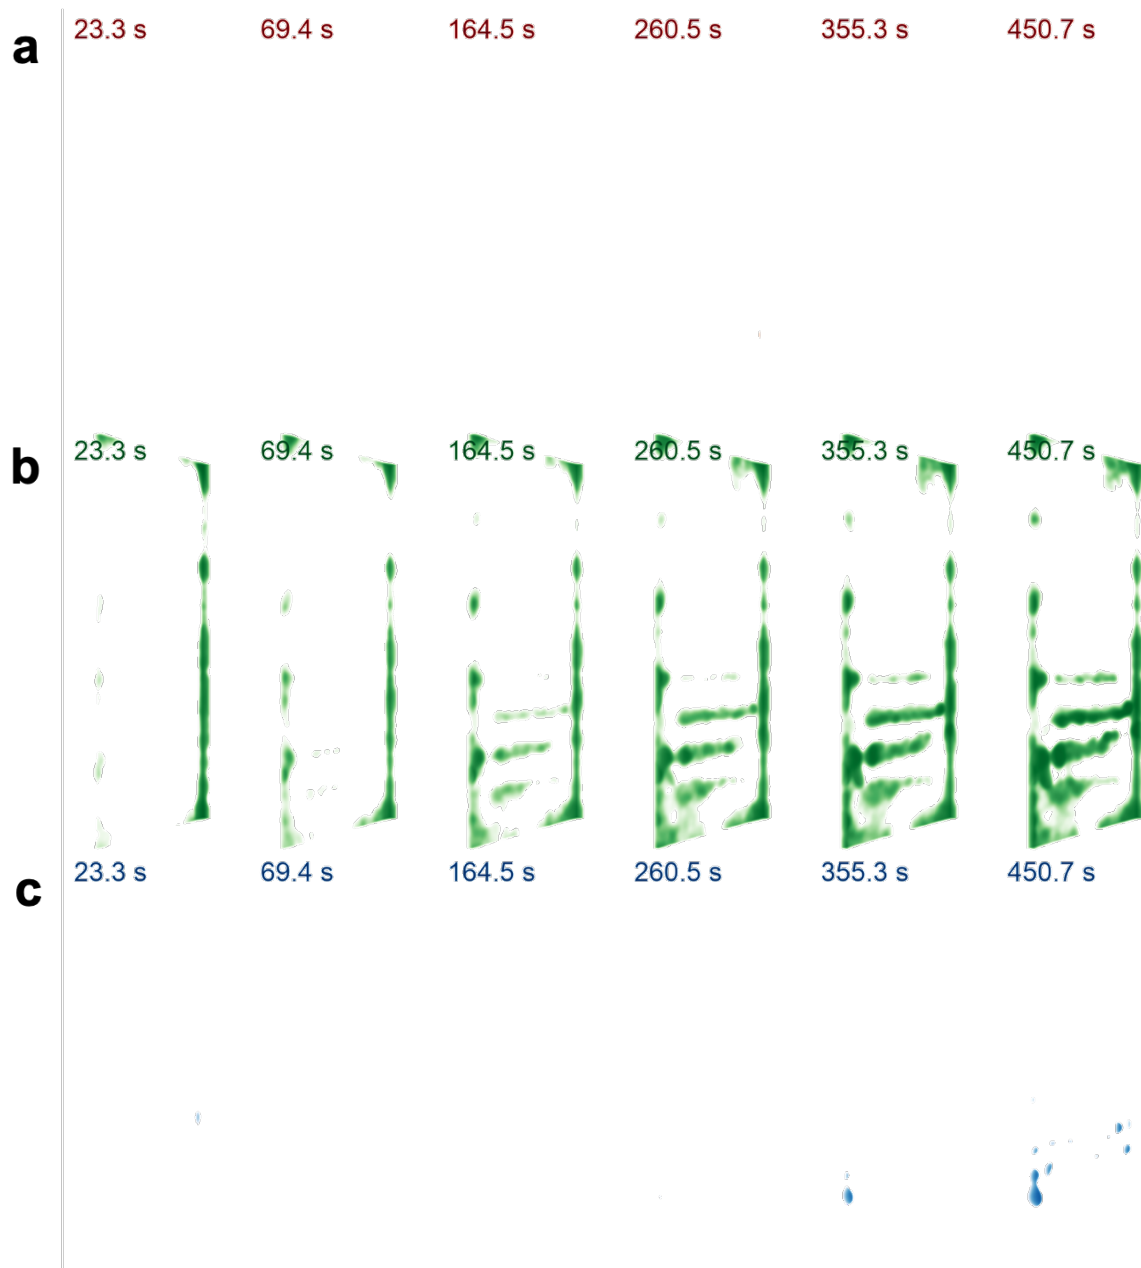

**Supplementary Figure 3: 3D visualisation of the water evolution in the single serpentine PEFC.** Water evolution in the **a** anode flow field (red), **b** the MEA (green) and **c** the cathode flow field (blue) at a constant current hold of 100 mA/cm<sup>2</sup>.

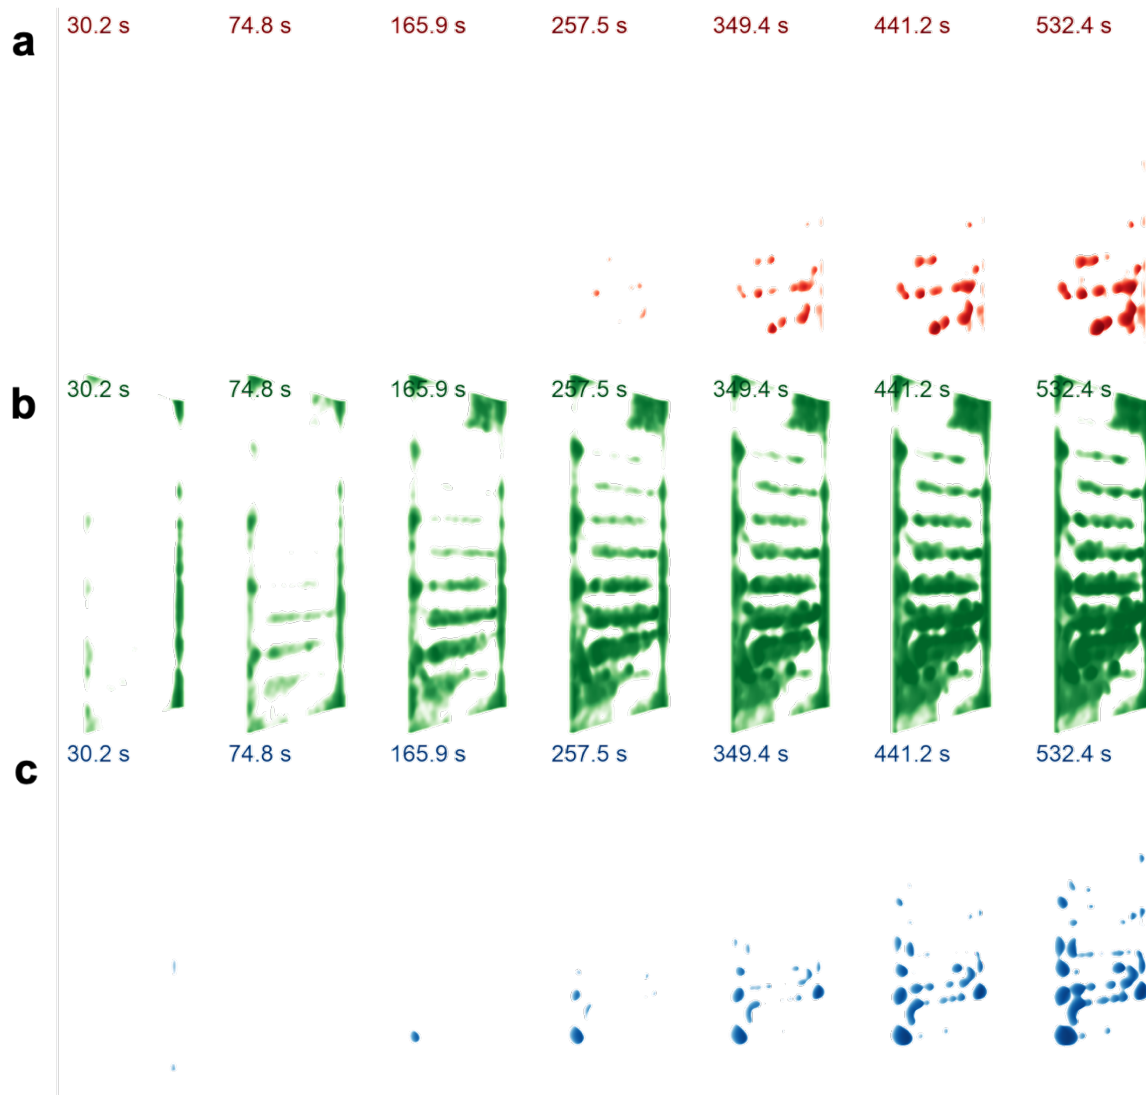

**Supplementary Figure 4: 3D visualisation of the water evolution in the single serpentine PEFC.** Water evolution in the **a** anode flow field (red), **b** the MEA (green) and **c** the cathode flow field (blue) at a constant current hold of 200 mA/cm<sup>2</sup>.

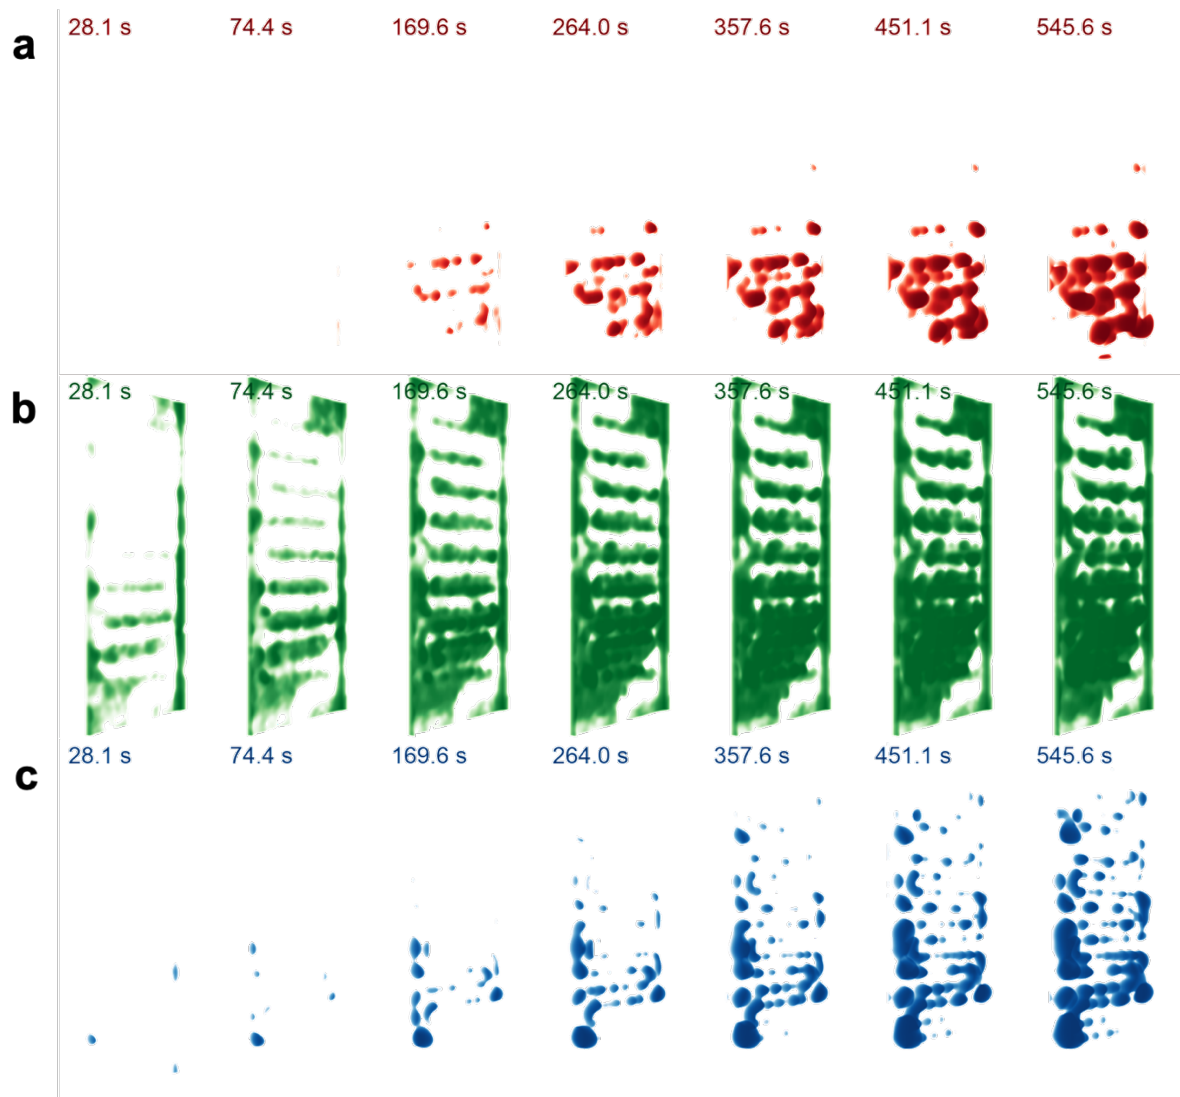

**Supplementary Figure 5: 3D visualisation of the water evolution in the single serpentine PEFC.** Water evolution in the **a** anode flow field (red), **b** the MEA (green) and **c** the cathode flow field (blue) at a constant current hold of 300 mA/cm<sup>2</sup>.

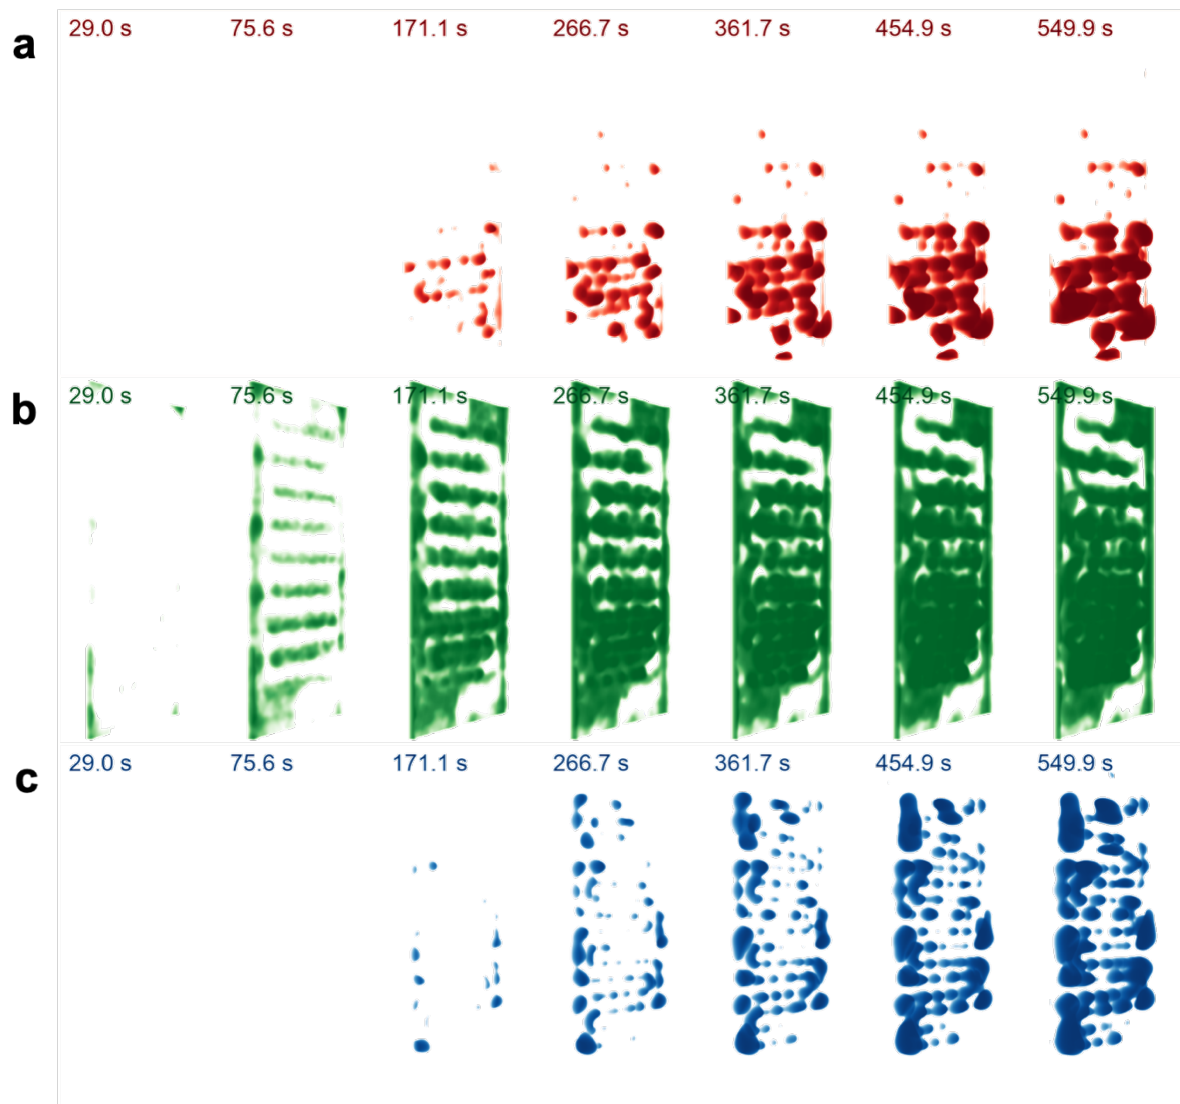

**Supplementary Figure 6: 3D visualisation of the water evolution in the single serpentine PEFC.** Water evolution in the **a** anode flow field (red), **b** the MEA (green) and **c** the cathode flow field (blue) at a constant current hold of 400 mA/cm<sup>2</sup>.

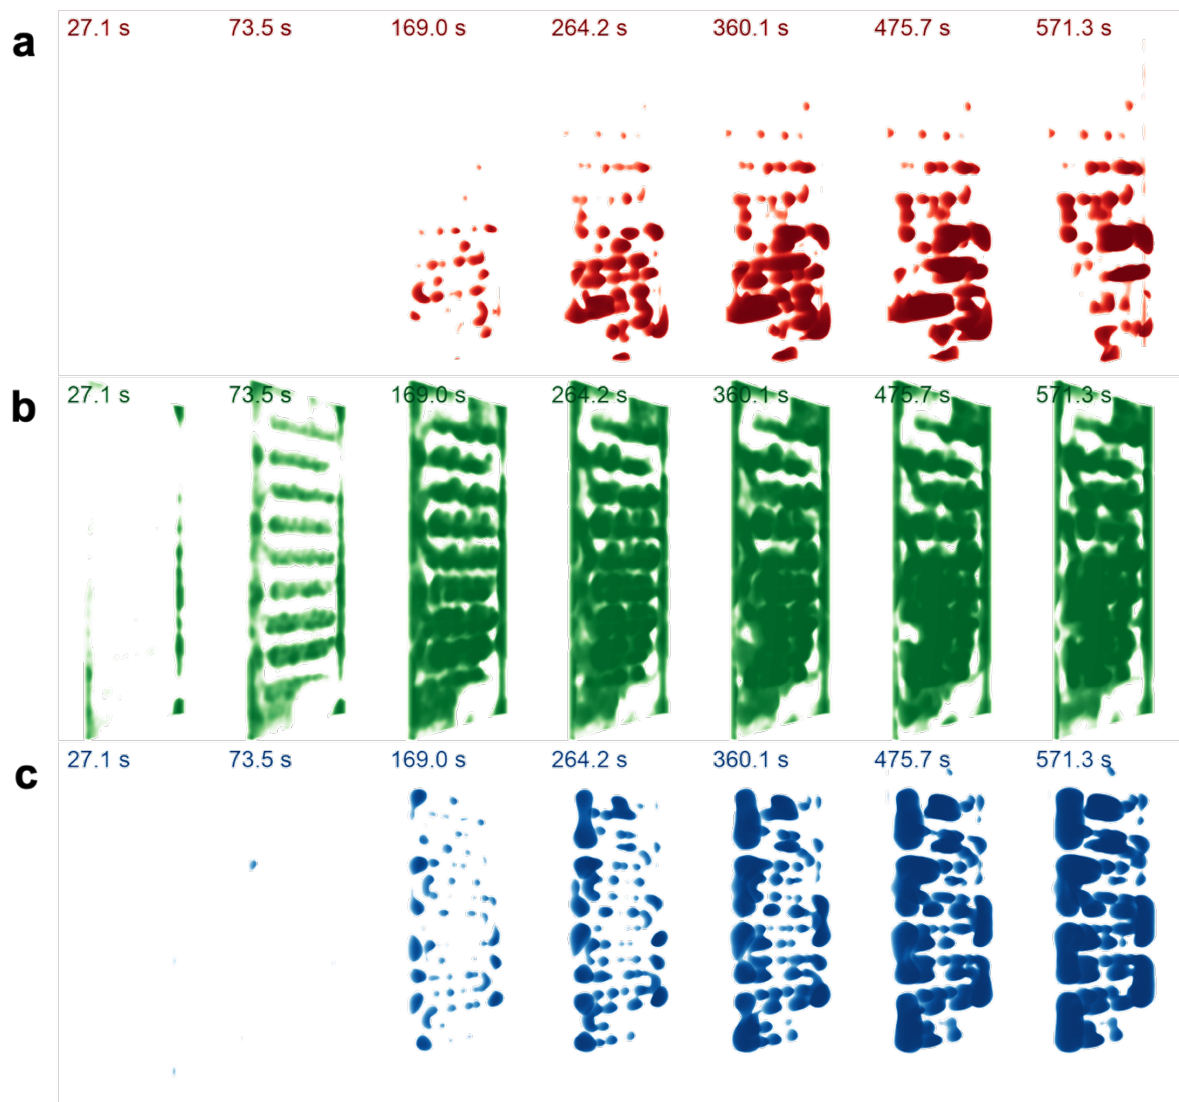

**Supplementary Figure 7: 3D visualisation of the water evolution in the single serpentine PEFC.** Water evolution in the **a** anode flow field (red), **b** the MEA (green) and **c** the cathode flow field (blue) at a constant current hold of 500 mA/cm<sup>2</sup>.

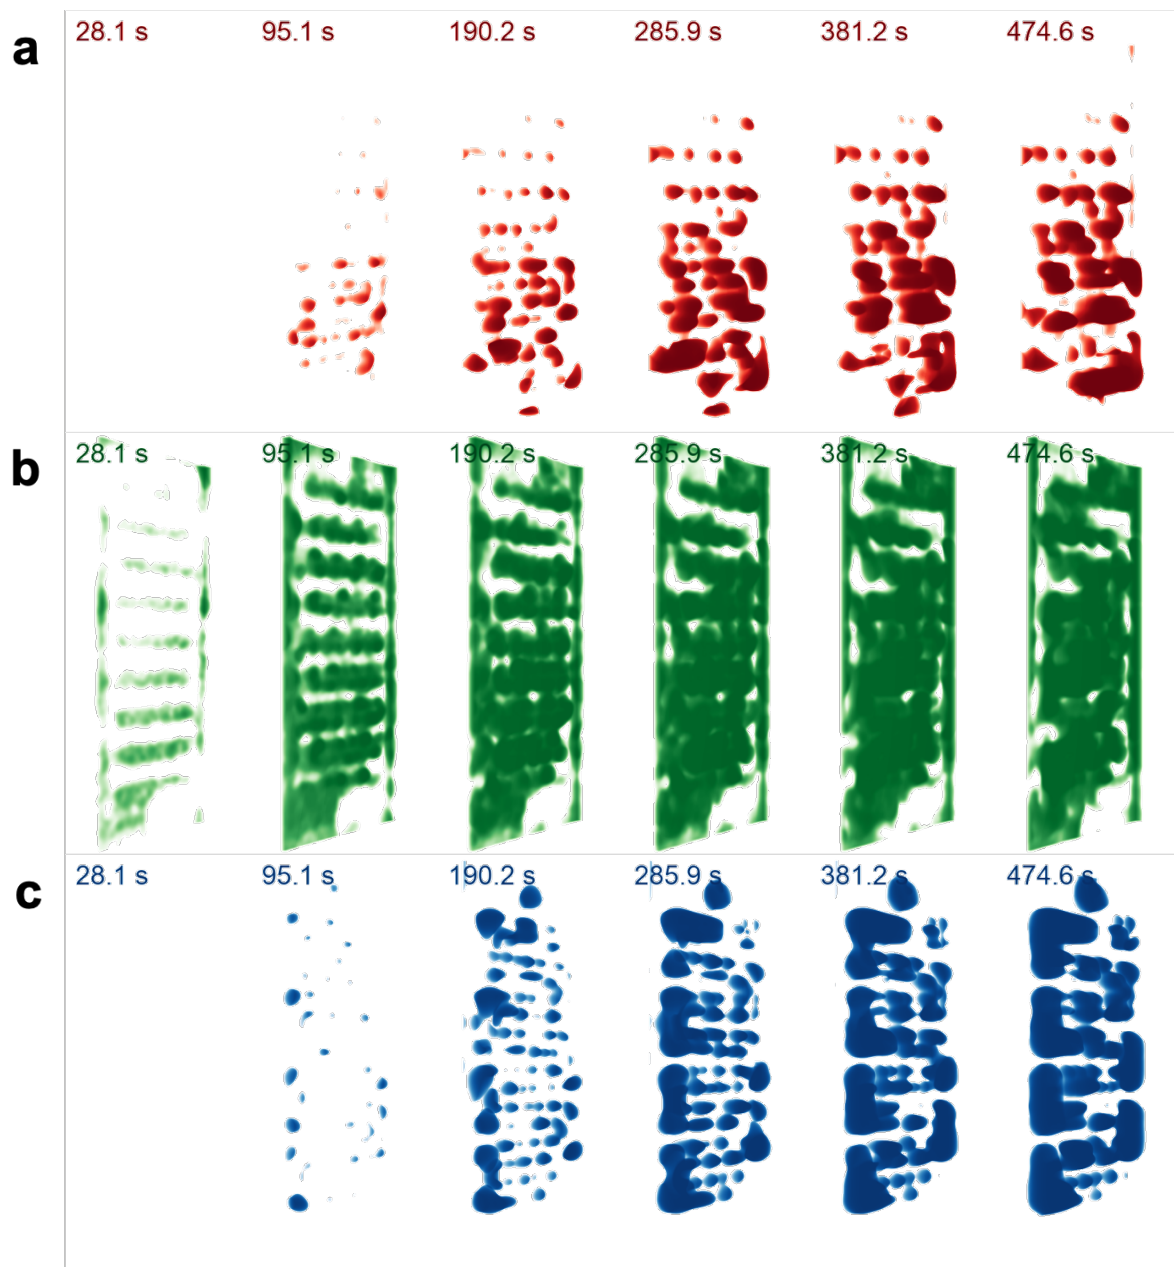

**Supplementary Figure 8: 3D visualisation of the water evolution in the single serpentine PEFC.** Water evolution in the **a** anode flow field (red), **b** the MEA (green) and **c** the cathode flow field (blue) at a constant current hold of  $600 \text{ mA/cm}^2$ .



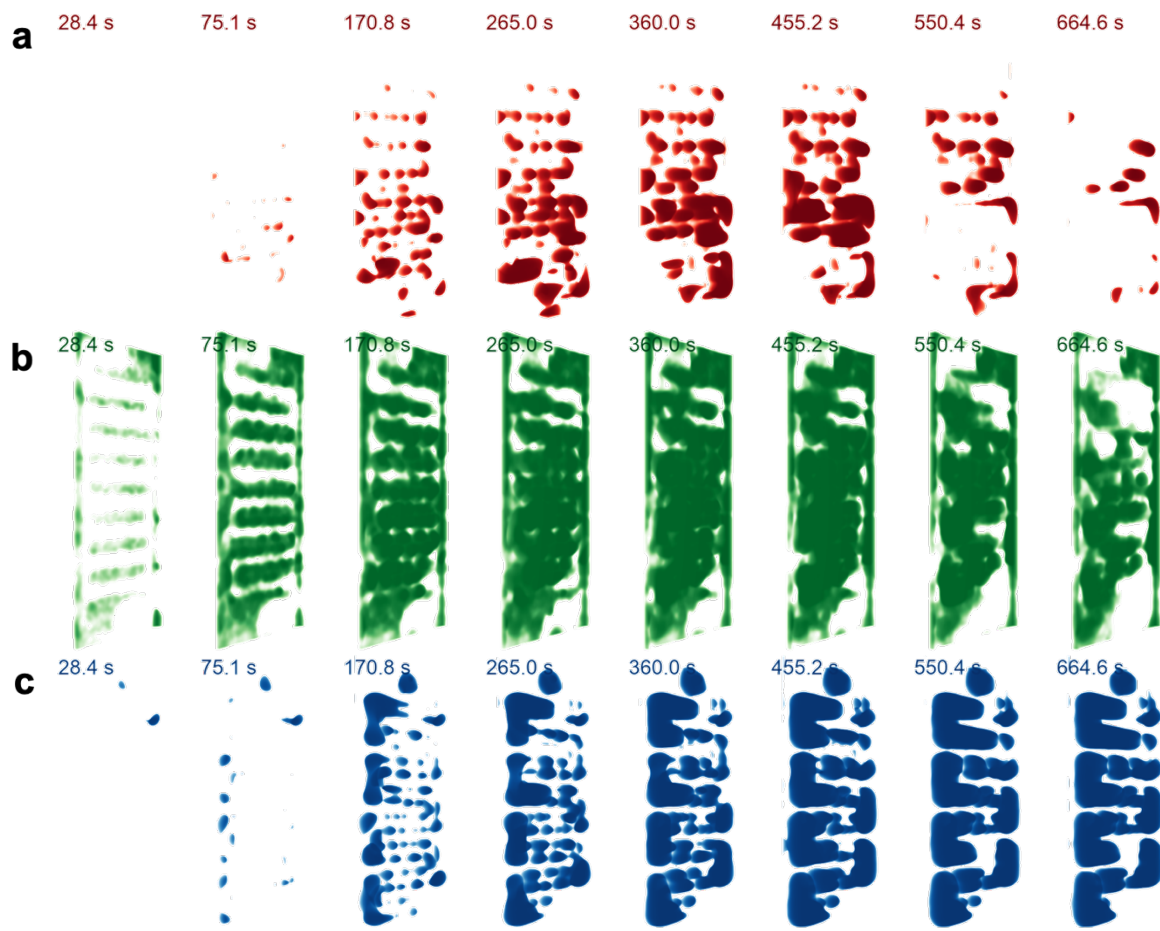

**Supplementary Figure 9: 3D visualisation of the water evolution in the single serpentine PEFC.** Water evolution in the **a** anode flow field (red), **b** the MEA (green) and **c** the cathode flow field (blue) at a constant current hold of 700 mA/cm<sup>2</sup>.

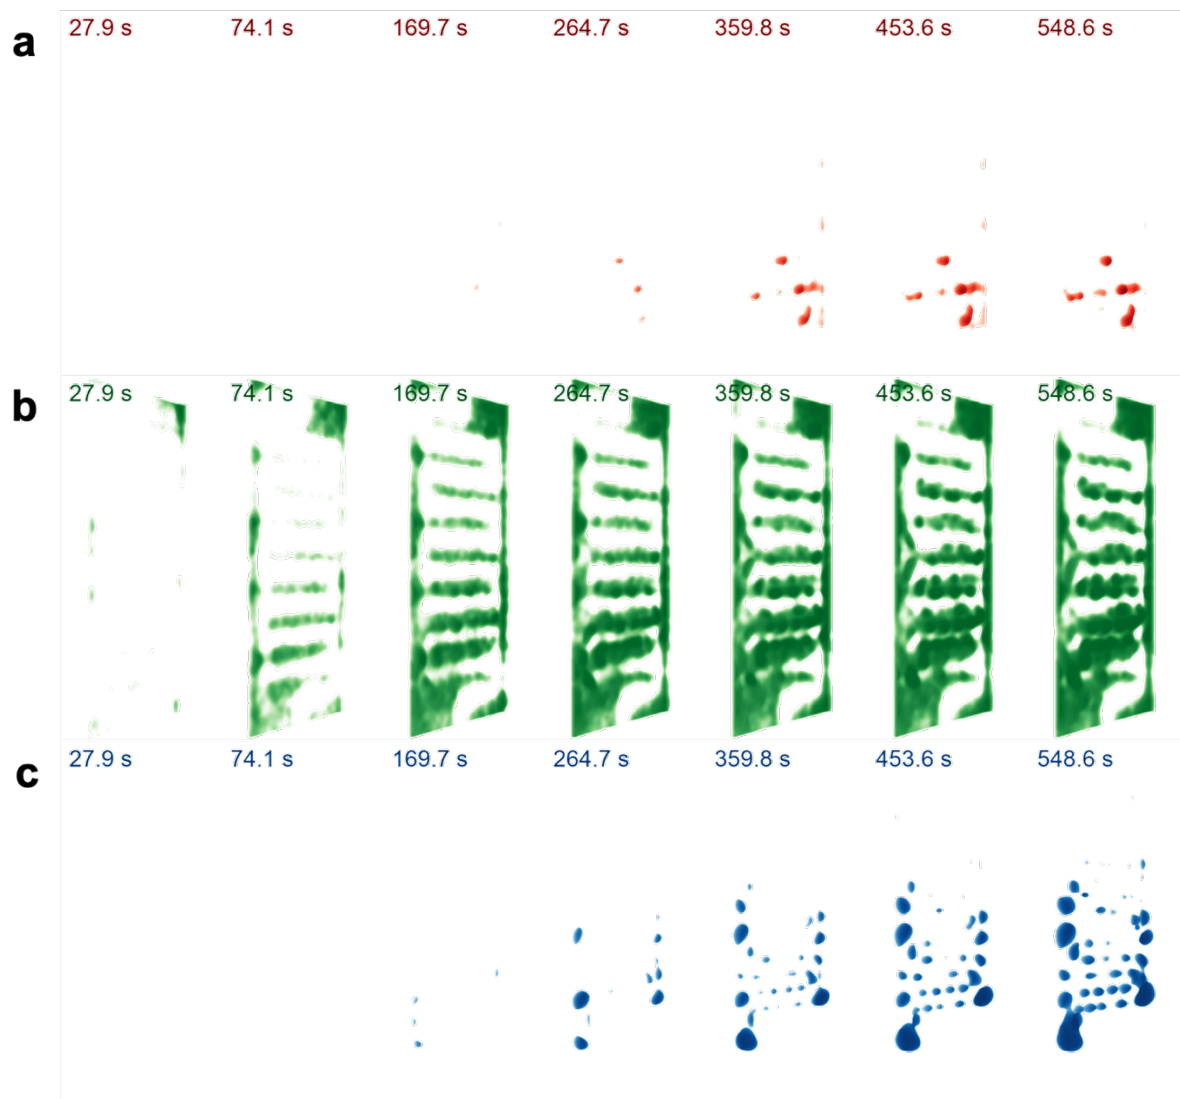

**Supplementary Figure 10: 3D visualisation of the water evolution in the single serpentine PEFC.** Water evolution in the **a** anode flow field (red), **b** the MEA (green) and **c** the cathode flow field (blue) at a constant potential hold at 0.7 V.

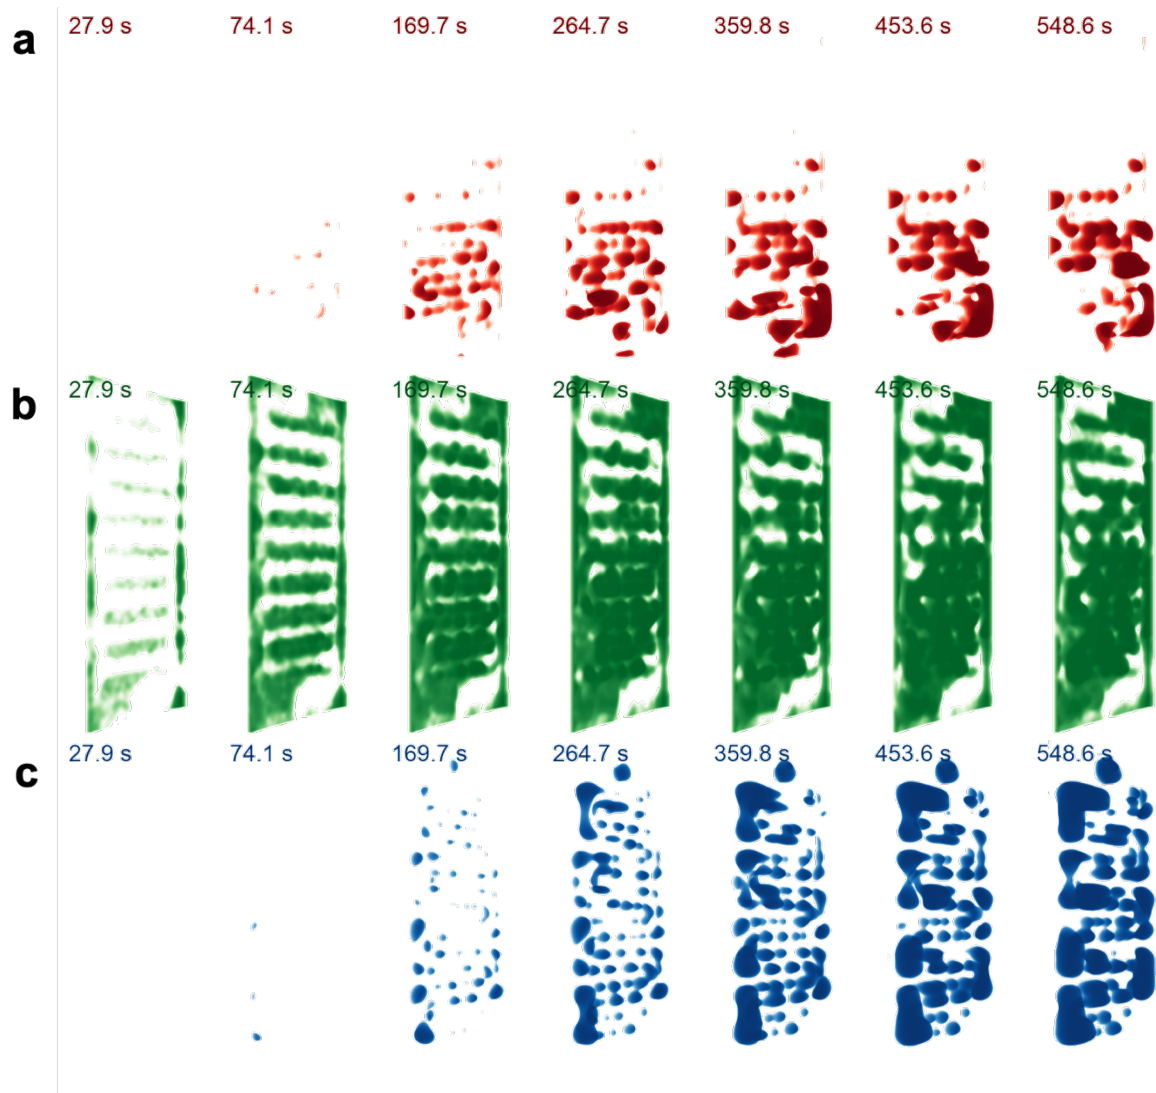

**Supplementary Figure 11: 3D visualisation of the water evolution in the single serpentine PEFC.** Water evolution in the **a** anode flow field (red), **b** the MEA (green) and **c** the cathode flow field (blue) at a constant potential hold at 0.5 V.

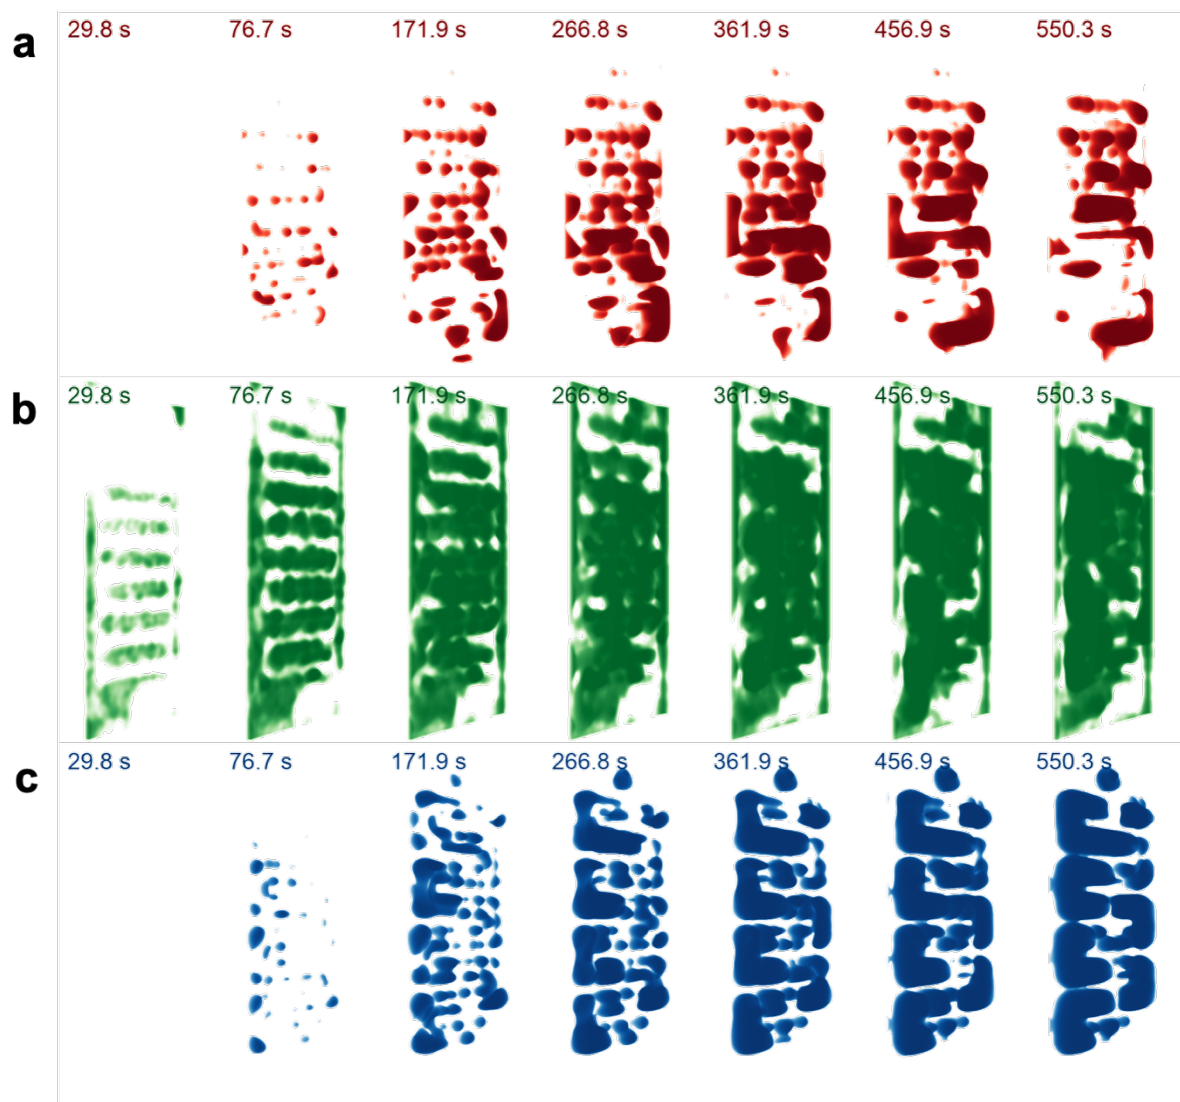

**Supplementary Figure 12: 3D visualisation of the water evolution in the single serpentine PEFC.** Water evolution in the **a** anode flow field (red), **b** the MEA (green) and **c** the cathode flow field (blue) at a constant potential hold at 0.3 V.

Fitting function:

$$f(t) = mt + y$$

100 mA/cm<sup>2</sup>: 0.0493 mm<sup>3</sup>/min

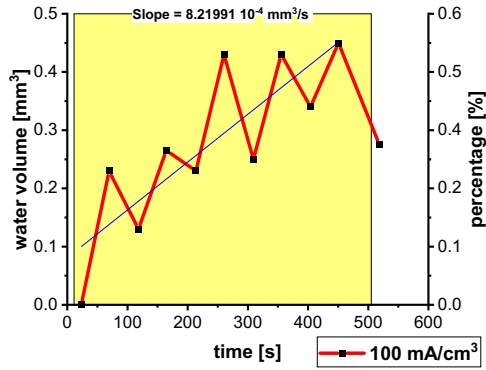

200 mA/cm<sup>2</sup>: 0.1146 mm<sup>3</sup>/min

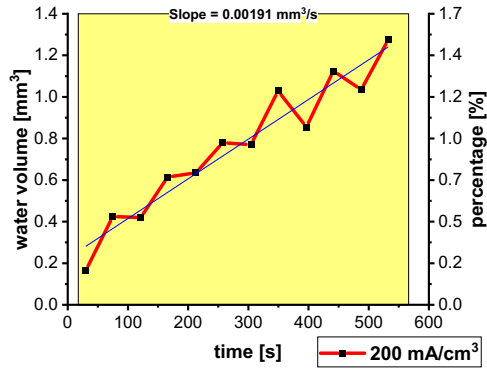

300 mA/cm<sup>2</sup>: 0.2484 mm<sup>3</sup>/min

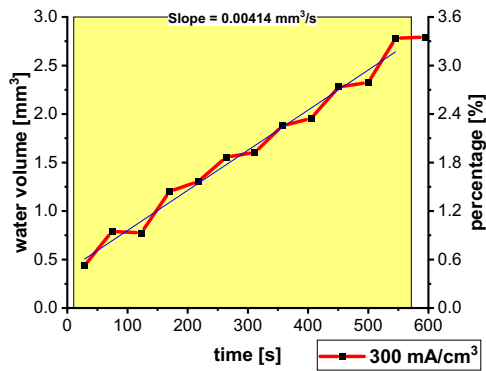

400 mA/cm<sup>2</sup>: 0.4824 mm<sup>3</sup>/min

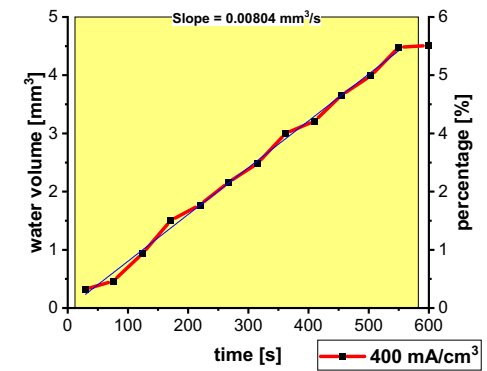

500 mA/cm<sup>2</sup>: 0.6750 mm<sup>3</sup>/min

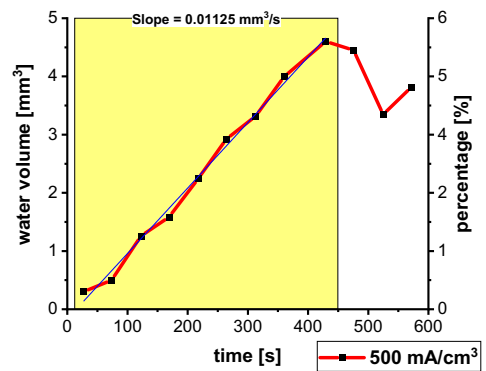

600 mA/cm<sup>2</sup>: 0.7344 mm<sup>3</sup>/min

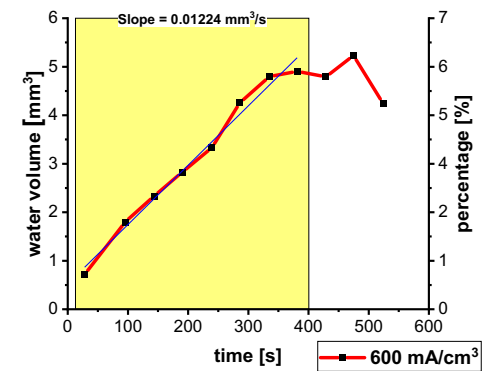

700 mA/cm<sup>2</sup>: 0.9846 mm<sup>3</sup>/min

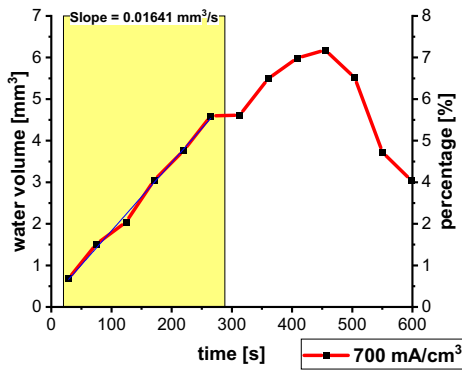

Supplementary Figure 13: Calculation of the water volume evolution inside the single serpentine anode flow field for different current holds from 100 to 700 mA/cm<sup>2</sup>.

0.7 V: 0.0452 mm<sup>3</sup>/min

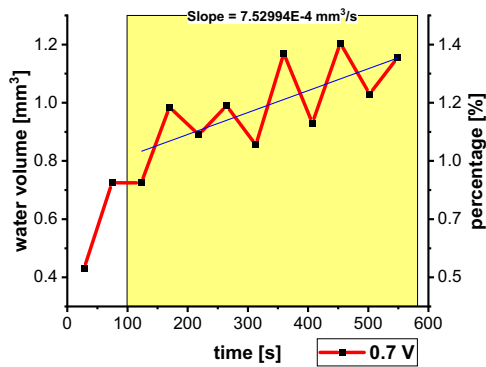

0.5 V: 0.4920 mm<sup>3</sup>/min

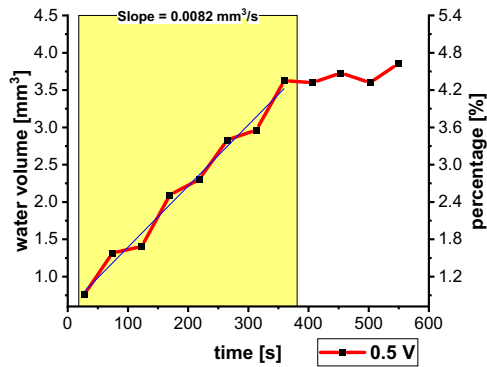

0.3 V: 1.1358 mm<sup>3</sup>/min

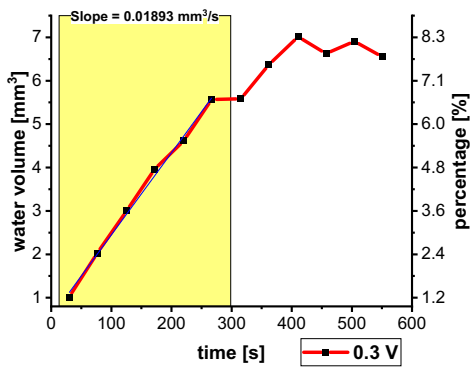

Supplementary Figure 14: Calculation of the water volume evolution inside the single serpentine anode flow field for different potential holds from 0.7 to 0.3 V.

**Supplementary Table 1: Slope of the water evolution in the single serpentine anode flow field for the different current and potential holds:** The determined slopes represent the time dependent water evolution in the anode flow field for different constant current densities and potentials.

| Current density [ $\text{mA cm}^{-2}$ ] | Water volume [ $\text{mm}^3 \text{s}^{-1}$ ] | Water volume [ $\text{mm}^3 \text{min}^{-1}$ ] |
|-----------------------------------------|----------------------------------------------|------------------------------------------------|
| 100                                     | 0.00082                                      | 0.0493                                         |
| 200                                     | 0.00191                                      | 0.1146                                         |
| 300                                     | 0.00414                                      | 0.2484                                         |
| 400                                     | 0.00804                                      | 0.4824                                         |
| 500                                     | 0.01125                                      | 0.6750                                         |
| 600                                     | 0.01224                                      | 0.7344                                         |
| 700                                     | 0.01641                                      | 0.9846                                         |
| Potential [V]                           | Water volume [ $\text{mm}^3 \text{s}^{-1}$ ] | Water volume [ $\text{mm}^3 \text{min}^{-1}$ ] |
| 0.7                                     | 0.00075                                      | 0.0452                                         |
| 0.5                                     | 0.0082                                       | 0.4920                                         |
| 0.3                                     | 0.01893                                      | 1.1358                                         |

**Supplementary Table 2: Slope of the water evolution in the single serpentine cathode flow field for the different current and potential holds:** The determined slopes represent the time dependent water evolution in the cathode flow field for different constant current densities and potentials.

| Current density [ $\text{mA cm}^{-2}$ ] | Water volume [ $\text{mm}^3 \text{s}^{-1}$ ] | Water volume [ $\text{mm}^3 \text{min}^{-1}$ ] |
|-----------------------------------------|----------------------------------------------|------------------------------------------------|
| 100                                     | 0.00154                                      | 0.0924                                         |
| 200                                     | 0.00378                                      | 0.2268                                         |
| 300                                     | 0.00761                                      | 0.4566                                         |
| 400                                     | 0.01152                                      | 0.6912                                         |
| 500                                     | 0.01601                                      | 0.9606                                         |
| 600                                     | 0.02256                                      | 1.3536                                         |
| 700                                     | 0.0266                                       | 1.5960                                         |
| Potential [V]                           | Water volume [ $\text{mm}^3 \text{s}^{-1}$ ] | Water volume [ $\text{mm}^3 \text{min}^{-1}$ ] |
| 0.7                                     | 0.00494                                      | 0.2964                                         |
| 0.5                                     | 0.0151                                       | 0.9060                                         |
| 0.3                                     | 0.02912                                      | 1.7472                                         |

Fitting function:

$$f(t) = mt + y$$

100 mA/cm<sup>2</sup>: 0.0924 mm<sup>3</sup>/min

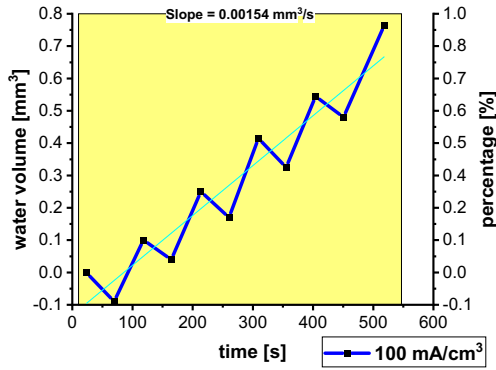

200 mA/cm<sup>2</sup>: 0.2268 mm<sup>3</sup>/min

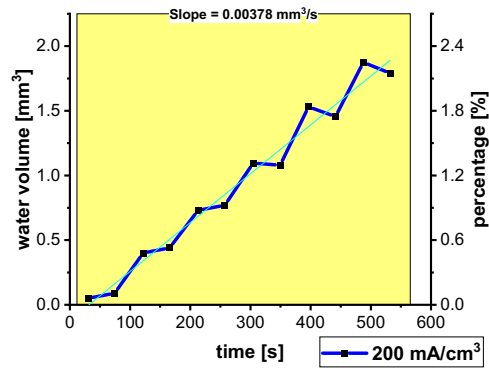

300 mA/cm<sup>2</sup>: 0.4566 mm<sup>3</sup>/min

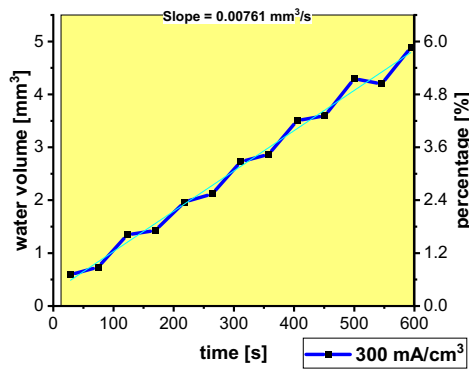

400 mA/cm<sup>2</sup>: 0.6912 mm<sup>3</sup>/min

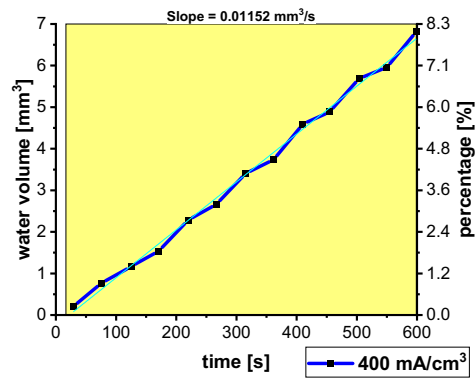

500 mA/cm<sup>2</sup>: 0.9606 mm<sup>3</sup>/min

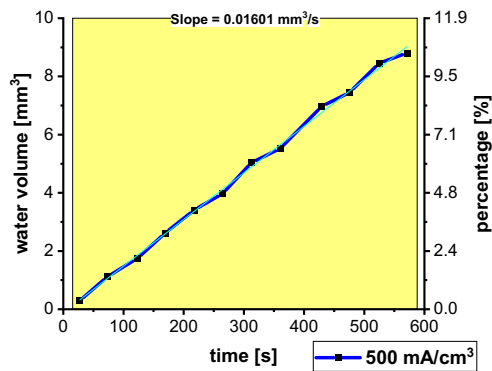

600 mA/cm<sup>2</sup>: 1.3536 mm<sup>3</sup>/min

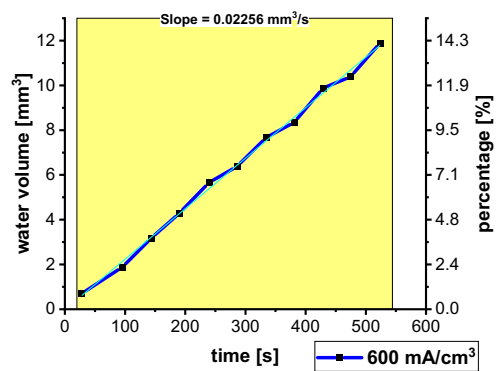



700 mA/cm<sup>2</sup>: 1.5960 mm<sup>3</sup>/min

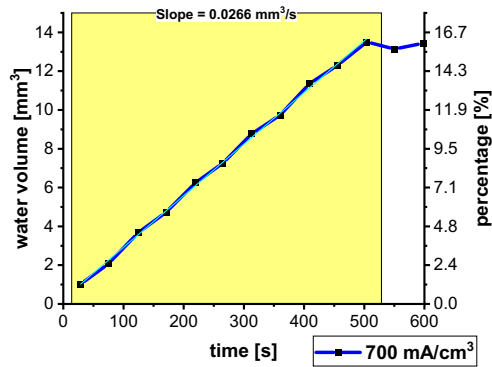

Supplementary Figure 15: Calculation of the water volume evolution inside the single serpentine cathode flow field for different current holds from 100 to 700 mA/cm<sup>2</sup>.

0.7 V: 0.2964 mm<sup>3</sup>/min

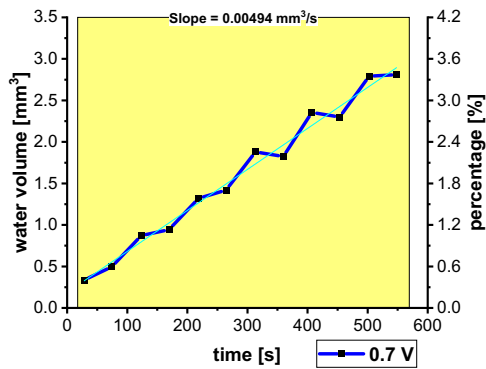

0.5 V: 0.9060 mm<sup>3</sup>/min

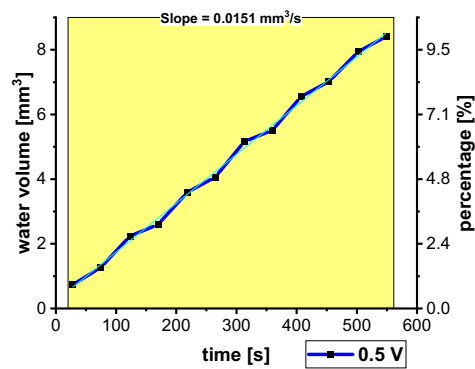

0.3 V: 1.7472 mm<sup>3</sup>/min

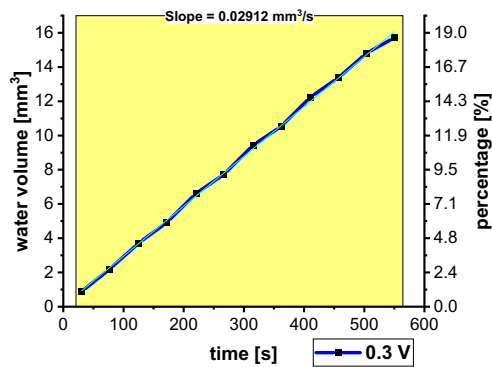

Supplementary Figure 16: Calculation of the water volume evolution inside the single serpentine cathode flow field for different potential holds from 0.7 to 0.3 V.

Fitting function:

$$f(t) = a \left( 1 - e^{-\frac{t}{\tau}} \right) + b$$

100 mA/cm<sup>2</sup>: 0.75 mm<sup>3</sup>

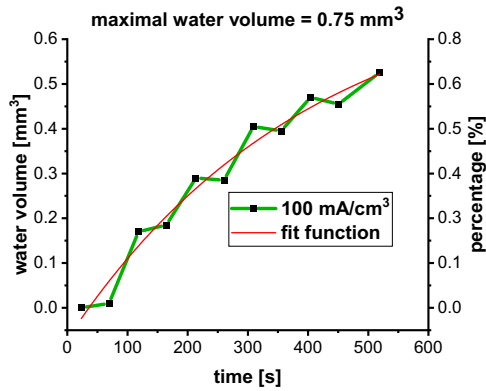

200 mA/cm<sup>2</sup>: 1.46 mm<sup>3</sup>

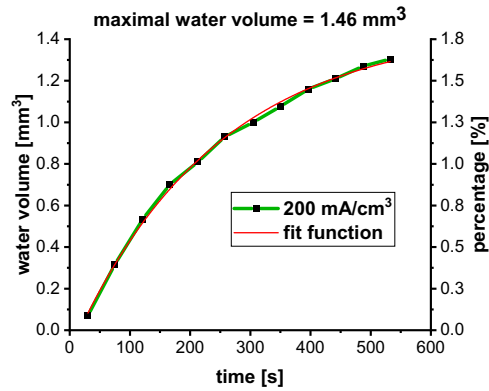

300 mA/cm<sup>2</sup>: 2.15 mm<sup>3</sup>

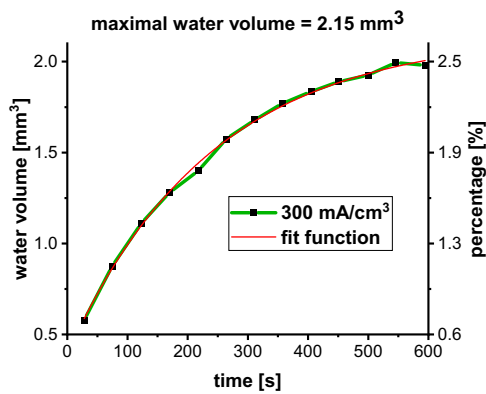

400 mA/cm<sup>2</sup>: 2.33 mm<sup>3</sup>

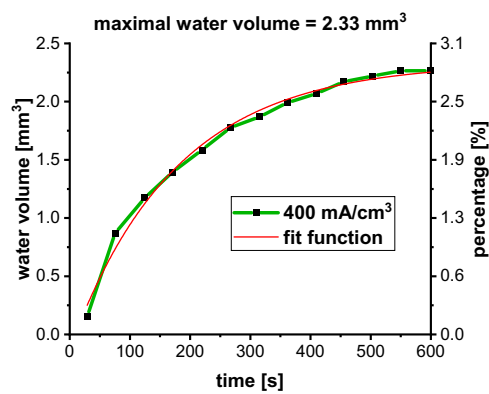

500 mA/cm<sup>2</sup>: 2.23 mm<sup>3</sup>

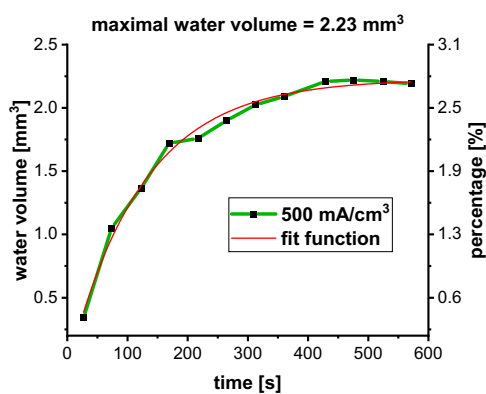

600 mA/cm<sup>2</sup>: 2.47 mm<sup>3</sup>

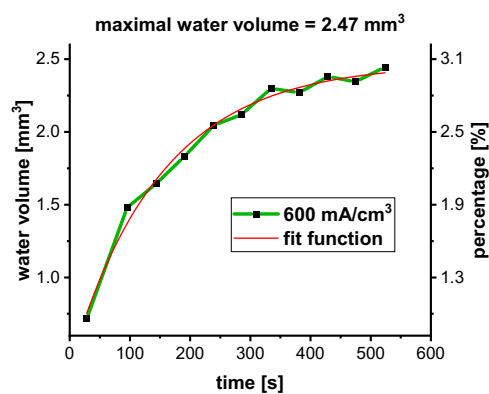

700 mA/cm<sup>2</sup>: 2.43 mm<sup>3</sup>

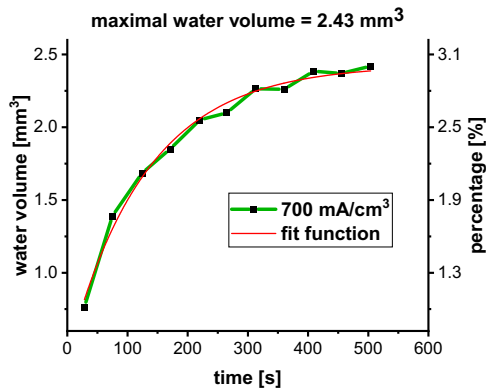

Supplementary Figure 17: Calculation of the maximal water saturation volume evolution inside the MEA of the single serpentine flow field fuel cell for different current holds from 100 to 700 mA/cm<sup>2</sup>.

0.7 V: 1.31 mm<sup>3</sup>

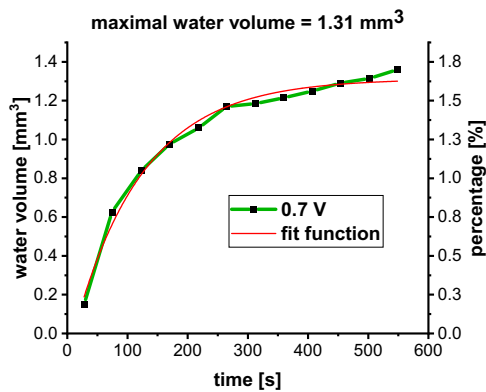

0.5 V: 2.05 mm<sup>3</sup>

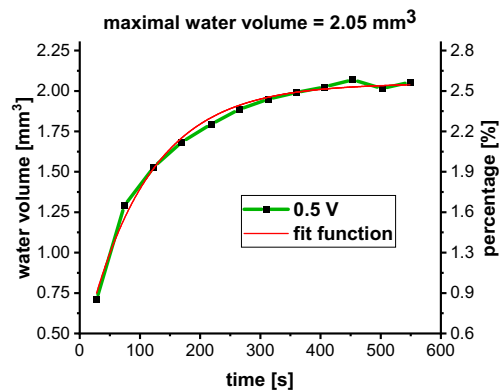

0.3 V: 2.53 mm<sup>3</sup>

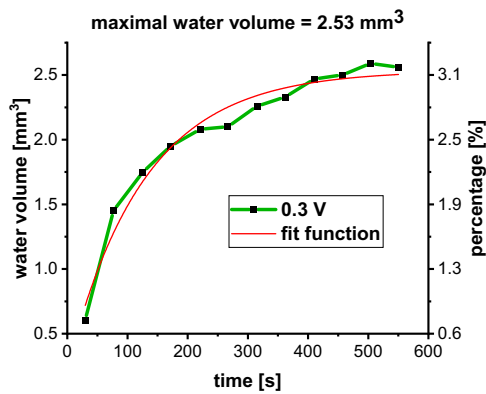

Supplementary Figure 18: Calculation of the maximal water saturation volume evolution inside the MEA of the single serpentine flow field fuel cell for different potential holds from 0.7 to 0.3 V.

**Supplementary Table 3: Current and potential dependent maximal water volume evolution in the MEA:** The maximal water volumes in the MEA show a current density and potential dependent behaviour and seem to converge towards a constant value for higher powers.

| Current density [ $\text{mA cm}^{-2}$ ] | Maximal water volume [ $\text{mm}^3$ ] |
|-----------------------------------------|----------------------------------------|
| 100                                     | 0.75                                   |
| 200                                     | 1.46                                   |
| 300                                     | 2.15                                   |
| 400                                     | 2.33                                   |
| 500                                     | 2.23                                   |
| 600                                     | 2.47                                   |
| 700                                     | 2.43                                   |
| Potential [V]                           | Maximal water volume [ $\text{mm}^3$ ] |
| 0.7                                     | 1.31                                   |
| 0.5                                     | 2.05                                   |
| 0.3                                     | 2.53                                   |

**Supplementary Table 4: Calculated times to reach 95 % and 99 % of the maximal water volume in the MEA and the equilibrium state for different current densities and potentials.**

| Current density [ $\text{mA cm}^{-2}$ ] | $t_{\text{equilibrium}} (p = 0.95)$ [s] | $t_{\text{equilibrium}} (p = 0.99)$ [s] |
|-----------------------------------------|-----------------------------------------|-----------------------------------------|
| 100                                     | 1283                                    | 2183                                    |
| 200                                     | 724                                     | 1061                                    |
| 300                                     | 663                                     | 1021                                    |
| 400                                     | 530                                     | 787                                     |
| 500                                     | 373                                     | 581                                     |
| 600                                     | 424                                     | 662                                     |
| 700                                     | 366                                     | 579                                     |
| Potential [V]                           | $t_{\text{equilibrium}} (p = 0.95)$ [s] | $t_{\text{equilibrium}} (p = 0.99)$ [s] |
| 0.7                                     | 369                                     | 634                                     |
| 0.5                                     | 298                                     | 479                                     |
| 0.3                                     | 365                                     | 554                                     |

**Supplementary Table 5: Experimentally determined water volume slope of the current and potential hold measurements.**

| <b>Current density [mA cm<sup>-2</sup>]</b> | <b>Water slope [mm<sup>3</sup> s<sup>-1</sup>]</b> | <b>Water slope [mm<sup>3</sup> min<sup>-1</sup>]</b> |
|---------------------------------------------|----------------------------------------------------|------------------------------------------------------|
| 100                                         | 0.00323                                            | 0.1938                                               |
| 200                                         | 0.00798                                            | 0.4788                                               |
| 300                                         | 0.01406                                            | 0.8436                                               |
| 400                                         | 0.02252                                            | 1.3512                                               |
| 500                                         | 0.03159                                            | 1.8954                                               |
| 600                                         | 0.04087                                            | 2.4522                                               |
| 700                                         | 0.04475                                            | 2.6850                                               |
| <b>Potential [V]</b>                        | <b>Water slope [mm<sup>3</sup> s<sup>-1</sup>]</b> | <b>Water slope [mm<sup>3</sup> min<sup>-1</sup>]</b> |
| 0.7                                         | 0.00646                                            | 0.3876                                               |
| 0.5                                         | 0.02508                                            | 1.5048                                               |
| 0.3                                         | 0.04700                                            | 2.8200                                               |

**Supplementary Table 6: Calculated water volume slope for current and potential hold conditions.**

| <b>Current density [mA cm<sup>-2</sup>]</b> | <b>Water slope [mm<sup>3</sup> s<sup>-1</sup>]</b> | <b>Water slope [mm<sup>3</sup> min<sup>-1</sup>]</b> |
|---------------------------------------------|----------------------------------------------------|------------------------------------------------------|
| 100                                         | 0.00938                                            | 0.5625                                               |
| 200                                         | 0.01875                                            | 1.1250                                               |
| 300                                         | 0.02813                                            | 1.6875                                               |
| 400                                         | 0.03750                                            | 2.2500                                               |
| 500                                         | 0.04688                                            | 2.8125                                               |
| 600                                         | 0.05625                                            | 3.3750                                               |
| 700                                         | 0.06563                                            | 3.9375                                               |
| <b>Potential [V]</b>                        | <b>Water slope [mm<sup>3</sup> s<sup>-1</sup>]</b> | <b>Water slope [mm<sup>3</sup> min<sup>-1</sup>]</b> |
| 0.7                                         | 0.02017                                            | 1.2102                                               |
| 0.5                                         | 0.04297                                            | 2.5782                                               |
| 0.3                                         | 0.07239                                            | 4.3434                                               |

Fitting function:

$$f(t) = mt + y$$

100 mA/cm<sup>2</sup>: 0.1938 mm<sup>3</sup>/min

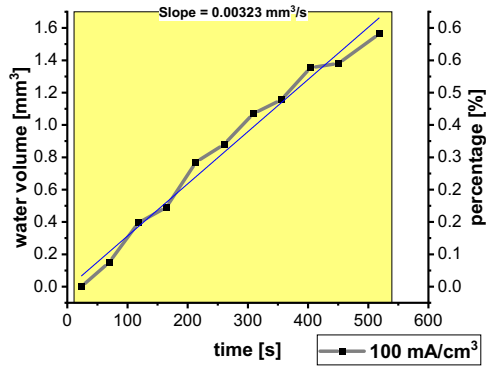

200 mA/cm<sup>2</sup>: 0.4788 mm<sup>3</sup>/min

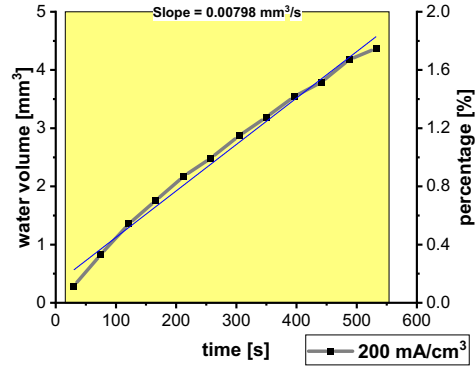

300 mA/cm<sup>2</sup>: 0.8436 mm<sup>3</sup>/min

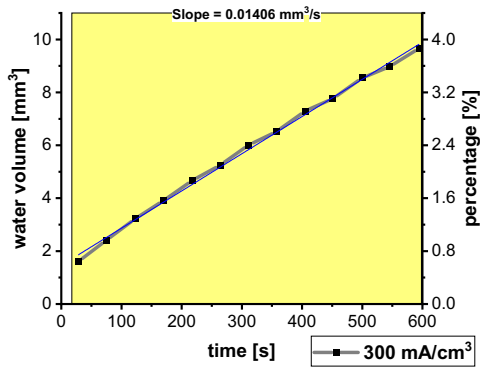

400 mA/cm<sup>2</sup>: 1.3512 mm<sup>3</sup>/min

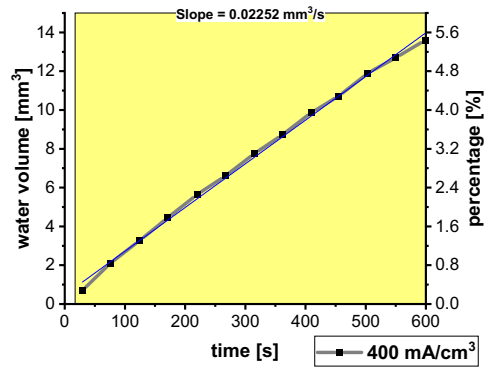

500 mA/cm<sup>2</sup>: 1.8954 mm<sup>3</sup>/min

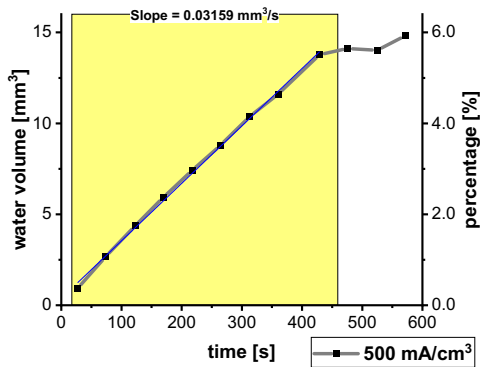

600 mA/cm<sup>2</sup>: 2.4522 mm<sup>3</sup>/min

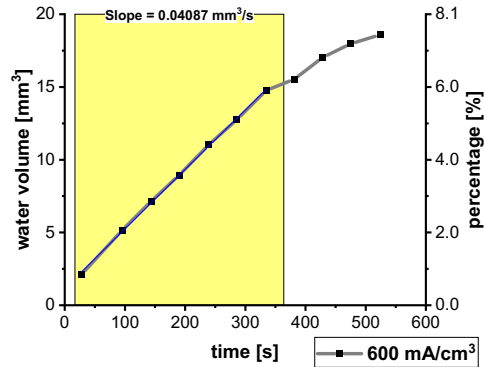

700 mA/cm<sup>2</sup>: 2.6850 mm<sup>3</sup>/min

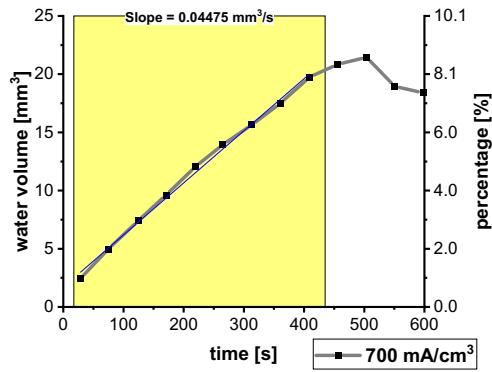

Supplementary Figure 19: Calculation of the water volume evolution inside the single serpentine PEFC for different current holds from 100 to 700 mA/cm<sup>2</sup>.

0.7 V: 0.3876 mm<sup>3</sup>/min

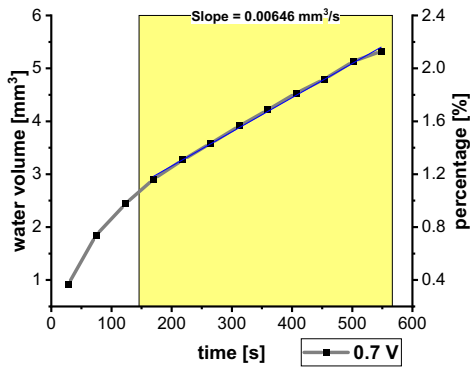

0.5 V: 1.5048 mm<sup>3</sup>/min

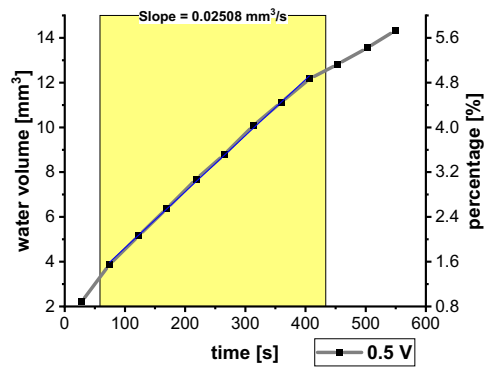

0.3 V: 2.8200 mm<sup>3</sup>/min

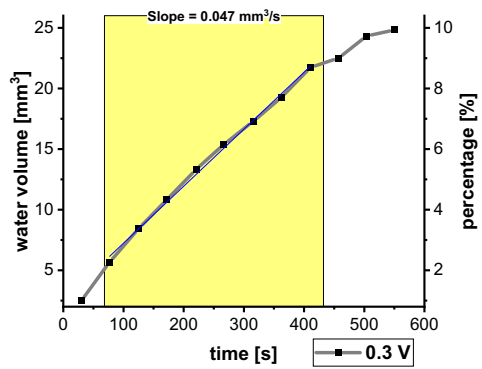

Supplementary Figure 20: Calculation of the water volume evolution inside the single serpentine PEFC for different potential holds from 0.7 to 0.3 V.
